# Supplementary material
Source: HighWire-hosted journal article supplement (http://rc.rcjournal.com/highwire/filestream/16357/field_highwire_adjunct_files/0/suppl.pdf)
Supplement: suppl.pdf [file suppl.pdf]

## Supplementary Material

### Effect of cardiogenic oscillations on trigger delay during pressure support ventilation

Glauco M. Plens, <sup>1</sup>

Caio C.A. Moraes, RRT, MSc<sup>1</sup>

Maria A. Nakamura, RRT, MSc<sup>1</sup>

P Nery, RRT, PhD<sup>2</sup>

Marcelo B. P. Amato, MD, PhD <sup>1</sup>

Mauro R. Tucci, MD, PhD

Eduardo L.V. Costa, MD, PhD <sup>1,2</sup>

<sup>1</sup> Cardio-Pulmonary Department, Pulmonary Division, Hospital das Clínicas, University of São Paulo, São Paulo, Brazil.

<sup>2</sup> Hospital Sírio Libanês, São Paulo, Brazil.

**Correspondence and requests for reprints should be addressed to:**

Prof. Dr. Eduardo Costa, Faculdade de Medicina – Universidade de São Paulo.

Av. Dr. Arnaldo 455, sala 2144 (2<sup>nd</sup> floor), São Paulo, SP, Brazil, CEP: 01246-903

Tel: 55-11-30617361; Fax: 55-11-30612492

Email : [eduardoleitecosta@gmail.com](mailto:eduardoleitecosta@gmail.com)

**Funding/Support:** This study was partially supported by FAPESP (Fundação de Amparo e Pesquisa do Estado de São Paulo)

## METHODS

### Effect of changes in the compliance of the respiratory system on cardiogenic oscillations

We programmed a standard inspiratory effort using the Active Servo Lung 5000 (ASL 5000, IngMar Medical™, Pennsylvania, USA), a breathing simulator which digitally controls a piston to simulate patient effort and respiratory system mechanics. For this study, ASL was set with a pulmonary compliance of 20 mL/cmH<sub>2</sub>O; airway resistance of 10 cmH<sub>2</sub>O·L<sup>-1</sup>·s, peak inspiratory effort of -10cmH<sub>2</sub>O; respiratory rate of 12 bpm; residual capacity of 500 mL.

Additionally, we also acquired data with different settings of pulmonary compliances (20, 40, 60 and 80 mL/cmH<sub>2</sub>O) using the Servo-I ventilator in order to assess the effect of changes in the compliance of the respiratory system on 1) cardiogenic oscillations displayed on airway pressure and flow curves (Figure S2), and 2) trigger performance (Table S6). We observed no significant change in time delay,  $\Delta P_{aw}$ , or WOB<sub>trig</sub> using different settings of compliance of the respiratory system. Likewise, airway pressure and flow waveforms did not change significantly with the different compliance levels.

### R Code for generating simulated cardiogenic oscillations

The code for generating the cardiogenic oscillations on top of the muscle pressure curve was written in R version 3.4.1:

```
# -Global parameters####
freq_aq = 512 # frequency of acquisition (ASL)
numero_de_ciclos = 20 # number of cycles

# -Pmus_parameters####
t_subida = 1 # upslope time
t_descida = 0.25 # downslope time
t_relaxado = 3.75 # 'relaxed' time
amplitude = 10 # amplitude

# -Heart beat parameters####
FC = 1.4 # Heart rate in Hz
amplitude_oscilacao = 0.25 # amplitude of the cardiogenic oscillation
relacao_contracao_relaxamento = 1/3 # ratio between systole and diastole

# -Creating the Pmus####
```

```

t_ins_1 = seq(from = 0, to = t_subida, by = 1/freq_aq)
t_ins_2 = seq(from = 0, to = t_descida, by = 1/freq_aq)
pmus_1 = amplitude*sin(t_ins_1*0.5*pi/t_subida)
pmus_2 = amplitude*sin(pi/2 + t_ins_2*0.5*pi/t_descida)
exp = rep(0, freq_aq * t_relaxado)
pmus = c(pmus_1, pmus_2, exp)

# -Isolated cardiogenic oscillation####
t_card = seq(from = 0, to = relacao_contracao_relaxamento/FC, by =
1/freq_aq)
oscilacao_cardiogenica = amplitude_oscilacao *
sin(t_card*pi*FC/relacao_contracao_relaxamento)
diast = rep(0, 1024/(FC / relacao_contracao_relaxamento))
oscilacao_isolada = c(oscilacao_cardiogenica, diast)
t_ciclo_cardicao = seq(from = 0, along.with = oscilacao_isolada)/512
num_ciclos = round(length(pmus)/length(oscilacao_isolada)) + 1
oscilacao = rep(oscilacao_isolada, num_ciclos)[1:length(pmus)]

# -Cardiogenic oscillation on top of Pmus####
Pmus_com_oscilacao = rep(-pmus - oscilacao, numero_de_ciclos)
t = seq(from = 0, along.with = Pmus_com_oscilacao)/512
plot(Pmus_com_oscilacao ~ t, type = 'l', bty = 'n', lwd = 2, ylab =
expression(bold('Pmus (cmH2*O)')), xlab = 'Tempo (s)', font.lab = 2)

# -Saves files for ASL5000####
num_files = length(Pmus_com_oscilacao)/(20*512) # 20-sec window
for (i in 1:num_files){
  write.table(x = Pmus_com_oscilacao[(20*512*(i-1)+1):(20*512*i)], file =
paste('Pmus_com_oscilacao_', i, '.txt'), row.names = F, col.names = F)
}

```

**Table S1.** Specification of mechanical ventilators tested

| <b>Ventilator</b> | <b>Flow Trigger Sensitivity</b>                               | <b>Inspiratory Rise Time</b> | <b>Inspiratory Flow</b> | <b>Bias Flow</b>                  |
|-------------------|---------------------------------------------------------------|------------------------------|-------------------------|-----------------------------------|
| Evita XL          | 0.3 – 15 L/min or when inspiratory volume > 25mL (for adults) | 0 – 2 s                      | 6 – 120 L/min           | None                              |
| Servo-i           | 0 – 100% (fraction of the fixed bias flow)                    | 0 – 0.2 s                    | 0 – 200 L/min           | Fixed; 2 L/min                    |
| PB840             | 0.1 – 10 L/min                                                | 1 – 100 %                    | 0 – 200 L/min           | Variable; Flow trigger +1.5 L/min |
| Fleximag          | 0 – 30 L/min                                                  | 0 – 2 s                      | 1 – 180 L/min           | 5 L/min                           |
| iX5               | 2 – 15 L/min                                                  | 25 – 100 %                   | 0 – 180 L/min           | 2 L/min                           |

**Table S2.** Trigger performance during a standard inspiratory effort without cardiogenic oscillation

| Ventilator / Trigger Sensitivity | TD (ms)    | $\Delta P_{aw}$ (cmH <sub>2</sub> O) | WOBi (J/L)    | WOBtrig (mJ) | PIF (L/min) | Cycles with auto-trigger (%) |
|----------------------------------|------------|--------------------------------------|---------------|--------------|-------------|------------------------------|
| <b>Evita XL</b>                  |            |                                      |               |              |             |                              |
| 0.3 L/min                        | 67 ± 6.2   | -0.69 ± 0.11                         | 0.466 ± 0.006 | 0.04 ± 0.01  | 70 ± 0.43   | 0                            |
| 0.5 L/min                        | 68 ± 5.4   | -0.72 ± 0.10                         | 0.476 ± 0.006 | 0.05 ± 0.01  | 69 ± 0.34   | 0                            |
| 1 L/min                          | 68 ± 6.5   | -0.71 ± 0.12                         | 0.474 ± 0.006 | 0.05 ± 0.01  | 69 ± 0.31   | 0                            |
| 2 L/min                          | 75 ± 8.7   | -0.75 ± 0.09                         | 0.489 ± 0.008 | 0.07 ± 0.03  | 70 ± 0.41   | 0                            |
| 3 L/min                          | 73 ± 4.7   | -0.76 ± 0.08                         | 0.509 ± 0.037 | 0.05 ± 0.01  | 70 ± 0.58   | 0                            |
| 5 L/min                          | 80 ± 12.6  | -0.79 ± 0.11                         | 0.511 ± 0.005 | 0.10 ± 0.09  | 71 ± 0.53   | 0                            |
| <b>PB840</b>                     |            |                                      |               |              |             |                              |
| -1 cmH <sub>2</sub> O            | 129 ± 16.8 | -1.14 ± 0.25                         | 0.507 ± 0.018 | 0.50 ± 0.17  | 80 ± 0.31   | 0                            |
| 1 L/min                          | 68 ± 0.0   | -0.38 ± 0.01                         | 0.443 ± 0.003 | 0.08 ± 0.00  | 76 ± 1.11   | 0                            |
| 2 L/min                          | 89 ± 3.5   | -0.42 ± 0.02                         | 0.465 ± 0.004 | 0.21 ± 0.03  | 77 ± 1.04   | 0                            |
| 3 L/min                          | 105 ± 8.6  | -0.45 ± 0.03                         | 0.486 ± 0.002 | 0.37 ± 0.07  | 78 ± 1.18   | 0                            |
| <b>Servo-I</b>                   |            |                                      |               |              |             |                              |
| -1 cmH <sub>2</sub> O            | 164 ± 3.5  | -1.64 ± 0.04                         | 0.581 ± 0.004 | 0.75 ± 0.05  | 71 ± 0.19   | 0                            |
| Flow 1                           | 129 ± 4.6  | -1.18 ± 0.05                         | 0.546 ± 0.017 | 0.38 ± 0.04  | 73 ± 0.15   | 0                            |
| Flow 2                           | 115 ± 3.9  | -1.04 ± 0.03                         | 0.540 ± 0.004 | 0.28 ± 0.03  | 69 ± 0.17   | 0                            |
| Flow 4                           | 94 ± 1.9   | -0.84 ± 0.02                         | 0.521 ± 0.002 | 0.15 ± 0.01  | 68 ± 0.13   | 0                            |
| Flow 6                           | 79 ± 4.1   | -0.68 ± 0.04                         | 0.504 ± 0.004 | 0.09 ± 0.01  | 67 ± 0.18   | 0                            |
| Flow 8                           | 65 ± 3.6   | -0.53 ± 0.05                         | 0.490 ± 0.004 | 0.05 ± 0.01  | 67 ± 0.17   | 0                            |
| Flow 10                          | 45 ± 7.4   | -0.28 ± 0.10                         | 0.468 ± 0.007 | 0.01 ± 0.01  | 66 ± 0.25   | 0                            |
| <b>FlexiMag</b>                  |            |                                      |               |              |             |                              |
| -1 cmH <sub>2</sub> O            | 107 ± 7.3  | -0.99 ± 0.10                         | 0.576 ± 0.006 | 0.24 ± 0.04  | 61 ± 0.27   | 0                            |
| 1 L/min                          | 75 ± 12.8  | -0.68 ± 0.16                         | 0.553 ± 0.010 | 0.08 ± 0.04  | 60 ± 0.27   | 0                            |
| 2 L/min                          | 90 ± 23.9  | -0.81 ± 0.18                         | 0.571 ± 0.015 | 0.15 ± 0.13  | 61 ± 0.46   | 0                            |
| 3 L/min                          | 98 ± 25.4  | -0.58 ± 0.15                         | 0.574 ± 0.013 | 0.31 ± 0.19  | 61 ± 0.51   | 0                            |
| <b>iX5</b>                       |            |                                      |               |              |             |                              |
| -1 cmH <sub>2</sub> O            | 209 ± 5.3  | -2.18 ± 0.04                         | 0.650 ± 0.007 | 1.25 ± 0.07  | 70 ± 2.69   | 0                            |
| 2 L/min                          | 222 ± 2.3  | -2.24 ± 0.02                         | 0.703 ± 0.005 | 1.47 ± 0.04  | 70 ± 1.72   | 0                            |
| 3 L/min                          | 228 ± 11.7 | -2.27 ± 0.02                         | 0.719 ± 0.008 | 1.64 ± 0.52  | 71 ± 2.03   | 0                            |

*Definition of abbreviations:* TD = time delay to trigger;  $\Delta P_{aw}$  = variation from PEEP to lowest inspiratory airway pressure; WOBi = patient inspiratory work of breathing; WOBtrig = work of breathing while triggering; PIF = peak inspiratory flow.

**Table S3.** Trigger performance during a standard inspiratory effort during 0.25 cmH<sub>2</sub>O of cardiogenic oscillation.

| Ventilator / Trigger Sensitivity | TD (ms)    | $\Delta P_{aw}$ (cmH <sub>2</sub> O) | WOBi (J/L)    | WOBtrig (mJ) | PIF (L/min) | Cycles with auto-trigger (%) |
|----------------------------------|------------|--------------------------------------|---------------|--------------|-------------|------------------------------|
| <b>Evita XL</b>                  |            |                                      |               |              |             |                              |
| 1 L/min                          | 77 ± 2.9   | -0.95 ± 0.06                         | 0.446 ± 0.006 | 0.05 ± 0.01  | 71 ± 0.64   | 50                           |
| 2 L/min                          | 93 ± 7.9   | -1.09 ± 0.08                         | 0.471 ± 0.005 | 0.04 ± 0.04  | 71 ± 0.61   | 47                           |
| 3 L/min                          | 72 ± 13.7  | -0.71 ± 0.19                         | 0.457 ± 0.015 | 0.08 ± 0.07  | 71 ± 0.63   | 23                           |
| 4 L/min                          | 75 ± 13.5  | -0.69 ± 0.11                         | 0.451 ± 0.007 | 0.12 ± 0.10  | 72 ± 0.33   | 0                            |
| 5 L/min                          | 75 ± 13.5  | -0.69 ± 0.11                         | 0.451 ± 0.007 | 0.12 ± 0.10  | 72 ± 0.33   | 0                            |
| <b>PB840</b>                     |            |                                      |               |              |             |                              |
| -1 cmH <sub>2</sub> O            | 116 ± 12.8 | -1.16 ± 0.18                         | 0.486 ± 0.014 | 0.28 ± 0.07  | 81 ± 0.36   | 0                            |
| 1 L/min                          | 64 ± 2.6   | -0.37 ± 0.02                         | 0.436 ± 0.002 | 0.06 ± 0.01  | 78 ± 0.97   | 39                           |
| 2 L/min                          | 81 ± 3.1   | -0.43 ± 0.02                         | 0.454 ± 0.004 | 0.12 ± 0.02  | 79 ± 0.97   | 0                            |
| 3 L/min                          | 101 ± 3.3  | -0.53 ± 0.04                         | 0.471 ± 0.003 | 0.17 ± 0.03  | 80 ± 1.11   | 0                            |
| 4 L/min                          | 119 ± 3.8  | -0.60 ± 0.05                         | 0.490 ± 0.003 | 0.27 ± 0.04  | 81 ± 1.20   | 0                            |
| <b>Servo-I</b>                   |            |                                      |               |              |             |                              |
| -1 cmH <sub>2</sub> O            | 152 ± 5.1  | -1.73 ± 0.07                         | 0.568 ± 0.005 | 0.77 ± 0.04  | 70 ± 0.30   | 0                            |
| Flow 10                          | 63 ± 7.4   | -0.51 ± 0.08                         | 0.501 ± 0.008 | 0.04 ± 0.01  | 66 ± 0.36   | 61                           |
| Flow 9                           | 62 ± 2.8   | -0.52 ± 0.03                         | 0.497 ± 0.002 | 0.06 ± 0.01  | 66 ± 0.31   | 13                           |
| Flow 8                           | 67 ± 3.5   | -0.56 ± 0.04                         | 0.503 ± 0.004 | 0.08 ± 0.02  | 67 ± 0.21   | 20                           |
| Flow 7                           | 74 ± 2.3   | -0.68 ± 0.03                         | 0.510 ± 0.022 | 0.11 ± 0.01  | 67 ± 0.00   | 0                            |
| Flow 6                           | 77 ± 9.3   | -0.68 ± 0.07                         | 0.513 ± 0.010 | 0.11 ± 0.02  | 67 ± 0.30   | 13                           |
| Flow 5                           | 83 ± 2.2   | -0.77 ± 0.03                         | 0.507 ± 0.002 | 0.15 ± 0.01  | 67 ± 0.00   | 0                            |
| Flow 4                           | 91 ± 4.6   | -0.84 ± 0.06                         | 0.514 ± 0.005 | 0.21 ± 0.03  | 67 ± 0.27   | 13                           |
| Flow 3                           | 97 ± 6.0   | -0.91 ± 0.07                         | 0.520 ± 0.006 | 0.25 ± 0.05  | 68 ± 0.30   | 0                            |
| Flow 2                           | 109 ± 6.4  | -1.07 ± 0.10                         | 0.531 ± 0.007 | 0.34 ± 0.05  | 68 ± 0.36   | 0                            |
| Flow 1                           | 113 ± 11.1 | -1.11 ± 0.14                         | 0.535 ± 0.011 | 0.39 ± 0.09  | 68 ± 0.34   | 0                            |
| <b>FlexiMag</b>                  |            |                                      |               |              |             |                              |
| -1 cmH <sub>2</sub> O            | 81 ± 13.1  | -0.97 ± 0.10                         | 0.543 ± 0.011 | 0.12 ± 0.09  | 65 ± 0.93   | 0                            |
| 1 L/min                          | 85 ± 15.2  | -0.96 ± 0.20                         | 0.551 ± 0.012 | 0.12 ± 0.04  | 65 ± 0.28   | 5                            |
| 2 L/min                          | 81 ± 19.2  | -0.89 ± 0.29                         | 0.553 ± 0.018 | 0.13 ± 0.07  | 66 ± 0.42   | 0                            |
| 3 L/min                          | 78 ± 15.0  | -0.77 ± 0.19                         | 0.556 ± 0.013 | 0.13 ± 0.10  | 66 ± 0.42   | 0                            |
| 4 L/min                          | 137 ± 14.5 | -1.08 ± 0.20                         | 0.591 ± 0.012 | 0.75 ± 0.15  | 68 ± 0.52   | 0                            |
| <b>iX5</b>                       |            |                                      |               |              |             |                              |
| -1 cmH <sub>2</sub> O            | 183 ± 9.3  | -2.02 ± 0.04                         | 0.631 ± 0.010 | 1.14 ± 0.29  | 70 ± 2.76   | 0                            |
| 2 L/min                          | 190 ± 2.3  | -2.07 ± 0.02                         | 0.683 ± 0.008 | 1.18 ± 0.04  | 70 ± 2.01   | 0                            |
| 3 L/min                          | 191 ± 2.5  | -2.07 ± 0.01                         | 0.691 ± 0.005 | 1.20 ± 0.04  | 70 ± 2.37   | 0                            |

*Definition of abbreviations:* TD = time delay to trigger;  $\Delta P_{aw}$  = variation from PEEP to lowest inspiratory airway pressure; WOBi = patient inspiratory work of breathing; WOBtrig = work of breathing while triggering; PIF = peak inspiratory flow.

**Table S4.** Trigger performance during a standard inspiratory effort during 0.5 cmH<sub>2</sub>O of cardiogenic oscillation.

| Ventilator / Trigger Sensitivity | TD (ms)    | $\Delta P_{aw}$ (cmH <sub>2</sub> O) | WOBi (J/L)    | WOBtrig (mJ) | PIF (L/min) | Cycles with auto-trigger (%) |
|----------------------------------|------------|--------------------------------------|---------------|--------------|-------------|------------------------------|
| <b>Evita XL</b>                  |            |                                      |               |              |             |                              |
| 1 L/min                          | 69 ± 5.11  | -0.91 ± 0.13                         | 0.443 ± 0.005 | 0.06 ± 0.01  | 71 ± 0.59   | 49                           |
| 2 L/min                          | 79 ± 5.9   | -1.08 ± 0.11                         | 0.452 ± 0.006 | 0.09 ± 0.04  | 71 ± 0.48   | 49                           |
| 3 L/min                          | 84 ± 9.9   | -1.14 ± 0.14                         | 0.468 ± 0.011 | 0.10 ± 0.11  | 71 ± 0.74   | 47                           |
| 4 L/min                          | 71 ± 10.5  | -0.84 ± 0.11                         | 0.459 ± 0.008 | 0.15 ± 0.15  | 72 ± 0.32   | 17                           |
| 5 L/min                          | 79 ± 14.9  | -0.85 ± 0.07                         | 0.467 ± 0.007 | 0.19 ± 0.17  | 72 ± 0.53   | 0                            |
| <b>PB840</b>                     |            |                                      |               |              |             |                              |
| -1 cmH <sub>2</sub> O            | 112 ± 12.3 | -1.25 ± 0.21                         | 0.481 ± 0.014 | 0.59 ± 0.16  | 81 ± 0.85   | 0                            |
| 1 L/min                          | 82 ± 4.2   | -0.48 ± 0.03                         | 0.458 ± 0.006 | 0.25 ± 0.04  | 80 ± 1.26   | 67                           |
| 2 L/min                          | 71 ± 2.6   | -0.32 ± 0.05                         | 0.455 ± 0.014 | 0.23 ± 0.03  | 81 ± 0.95   | 0                            |
| 3 L/min                          | 94 ± 3.3   | -0.52 ± 0.05                         | 0.466 ± 0.003 | 0.46 ± 0.05  | 81 ± 1.09   | 0                            |
| 4 L/min                          | 111 ± 2.8  | -0.62 ± 0.06                         | 0.483 ± 0.003 | 0.80 ± 0.05  | 81 ± 1.12   | 0                            |
| <b>Servo-I</b>                   |            |                                      |               |              |             |                              |
| -1 cmH <sub>2</sub> O            | 144 ± 1.7  | -1.86 ± 0.03                         | 0.572 ± 0.002 | 0.78 ± 0.03  | 69 ± 0.29   | 0                            |
| Flow 10                          | 64 ± 4.6   | -0.6 ± 0.06                          | 0.503 ± 0.004 | 0.05 ± 0.01  | 66 ± 0.29   | 67                           |
| Flow 9                           | 71 ± 4.1   | -0.7 ± 0.07                          | 0.509 ± 0.004 | 0.06 ± 0.01  | 67 ± 0.15   | 67                           |
| Flow 8                           | 74 ± 8.6   | -1.01 ± 0.35                         | 0.720 ± 0.083 | 0.09 ± 0.08  | 66 ± 0.21   | 65                           |
| Flow 7                           | 70 ± 6.2   | -0.69 ± 0.10                         | 0.507 ± 0.007 | 0.10 ± 0.01  | 67 ± 0.00   | 52                           |
| Flow 6                           | 70 ± 2.3   | -0.69 ± 0.04                         | 0.506 ± 0.002 | 0.12 ± 0.01  | 67 ± 0.00   | 23                           |
| Flow 5                           | 75 ± 2.7   | -0.75 ± 0.04                         | 0.511 ± 0.003 | 0.15 ± 0.02  | 67 ± 0.29   | 13                           |
| Flow 4                           | 83 ± 5.4   | -0.86 ± 0.08                         | 0.519 ± 0.005 | 0.20 ± 0.03  | 67 ± 0.15   | 20                           |
| Flow 3                           | 92 ± 5.4   | -0.98 ± 0.07                         | 0.527 ± 0.005 | 0.28 ± 0.05  | 67 ± 0.30   | 9                            |
| Flow 2                           | 95 ± 8.4   | -1.0 ± 0.17                          | 0.529 ± 0.008 | 0.31 ± 0.07  | 68 ± 0.34   | 5                            |
| Flow 1                           | 96 ± 10.3  | -1.2 ± 0.19                          | 0.535 ± 0.010 | 0.35 ± 0.1   | 68 ± 0.15   | 0                            |
| <b>FlexiMag</b>                  |            |                                      |               |              |             |                              |
| -1 cmH <sub>2</sub> O            | 72 ± 7.4   | -1.01 ± 0.14                         | 0.546 ± 0.007 | 0.06 ± 0.02  | 66 ± 0.42   | 0                            |
| 1 L/min                          | 65 ± 12.9  | -0.75 ± 0.41                         | 0.575 ± 0.074 | 0.15 ± 0.07  | 66.7 ± 0.43 | 57                           |
| 2 L/min                          | 94 ± 15.5  | -1.17 ± 0.21                         | 0.568 ± 0.012 | 0.27 ± 0.21  | 67.8 ± 0.21 | 0                            |
| 3 L/min                          | 114 ± 26.1 | -1.09 ± 0.27                         | 0.580 ± 0.015 | 0.56 ± 0.28  | 68 ± 0.47   | 0                            |
| 4 L/min                          | 131 ± 8.7  | -1.09 ± 0.20                         | 0.590 ± 0.009 | 0.91 ± 0.15  | 68 ± 0.45   | 0                            |
| <b>iX5</b>                       |            |                                      |               |              |             |                              |
| -1 cmH <sub>2</sub> O            | 174 ± 5.1  | -2.15 ± 0.02                         | 0.622 ± 0.006 | 1.15 ± 0.06  | 69 ± 2.87   | 0                            |
| 2 L/min                          | 180 ± 1.6  | -2.17 ± 0.01                         | 0.687 ± 0.006 | 1.23 ± 0.03  | 69 ± 2.19   | 0                            |
| 3 L/min                          | 182 ± 2.2  | -2.18 ± 0.02                         | 0.696 ± 0.005 | 1.25 ± 0.03  | 70 ± 1.35   | 0                            |

*Definition of abbreviations:* TD = time delay to trigger;  $\Delta P_{aw}$  = variation from PEEP to lowest inspiratory airway pressure; WOBi = patient inspiratory work of breathing; WOBtrig = work of breathing while triggering; PIF = peak inspiratory flow.

**Table S5.** Trigger performance during a standard inspiratory effort during 1 cmH<sub>2</sub>O of cardiogenic oscillation.

| Ventilator / Trigger Sensitivity | TD (ms)        | $\Delta P_{aw}$ (cmH <sub>2</sub> O) | WOB <sub>i</sub> (J/L) | WOB <sub>trig</sub> (mJ) | PIF (L/min)  | Cycles with auto-trigger (%) |
|----------------------------------|----------------|--------------------------------------|------------------------|--------------------------|--------------|------------------------------|
| <b>Evita XL</b>                  |                |                                      |                        |                          |              |                              |
| 1 L/min                          | 81.17 ± 3.41   | -1.36 ± 0.10                         | 0.459 ± 0.004          | 0.090 ± 0.018            | 71.52 ± 0.57 | 0.66                         |
| 2 L/min                          | 81.49 ± 3.73   | -1.35 ± 0.09                         | 0.465 ± 0.004          | 0.104 ± 0.04             | 71.67 ± 0.42 | 0.65                         |
| 3 L/min                          | 81.49 ± 4.19   | -1.32 ± 0.12                         | 0.468 ± 0.007          | 0.075 ± 0.022            | 71.75 ± 0.51 | 0.65                         |
| 4 L/min                          | 80.07 ± 8.67   | -1.31 ± 0.15                         | 0.472 ± 0.007          | 0.158 ± 0.098            | 71.92 ± 0.56 | 0.58                         |
| 5 L/min                          | 85.78 ± 13.49  | -1.27 ± 0.12                         | 0.472 ± 0.004          | 0.272 ± 0.203            | 72.28 ± 0.44 | 0.46                         |
| 6 L/min                          | 84.40 ± 10.75  | -1.22 ± 0.08                         | 0.479 ± 0.008          | 0.258 ± 0.137            | 72.37 ± 0.52 | 0.09                         |
| 7 L/min                          | 85.54 ± 8.74   | -1.25 ± 0.09                         | 0.484 ± 0.003          | 0.277 ± 0.139            | 72.51 ± 0.45 | 0                            |
| <b>PB840</b>                     |                |                                      |                        |                          |              |                              |
| -1 cmH <sub>2</sub> O            | 96.46 ± 2.13   | -1.17 ± 0.04                         | 0.470 ± 0.003          | 0.585 ± 0.031            | 82.04 ± 0.13 | 0                            |
| 1 L/min                          | 65.32 ± 0.43   | -0.56 ± 0.02                         | 0.449 ± 0.002          | 0.182 ± 0.025            | 81.44 ± 0.16 | 0.67                         |
| 2 L/min                          | 76.17 ± 6.14   | -0.59 ± 0.26                         | 0.458 ± 0.011          | 0.289 ± 0.069            | 81.79 ± 2.17 | 0.67                         |
| 3 L/min                          | 80.59 ± 9.84   | -0.71 ± 0.53                         | 0.458 ± 0.016          | 0.478 ± 0.043            | 82.65 ± 4.04 | 0.38                         |
| 4 L/min                          | 96.85 ± 3.08   | -0.69 ± 0.03                         | 0.472 ± 0.002          | 0.796 ± 0.081            | 81.90 ± 1.01 | 0                            |
| <b>Servo-I</b>                   |                |                                      |                        |                          |              |                              |
| -1 cmH <sub>2</sub> O            | 124.14 ± 3.77  | -1.96 ± 0.10                         | 0.550 ± 0.003          | 0.862 ± 0.052            | 68.76 ± 0.14 | 0                            |
| Flow 10                          | 60.54 ± 4.36   | -0.67 ± 0.09                         | 0.502 ± 0.004          | 0.091 ± 0.022            | 66.96 ± 0.11 | 0.67                         |
| Flow 9                           | 64.56 ± 2.12   | -0.76 ± 0.04                         | 0.505 ± 0.002          | 0.105 ± 0.014            | 67.02 ± 0.07 | 0.67                         |
| Flow 8                           | 66.06 ± 4.84   | -0.78 ± 0.09                         | 0.507 ± 0.004          | 0.124 ± 0.028            | 67.00 ± 0.11 | 0.67                         |
| Flow 7                           | 71.11 ± 4.14   | -0.88 ± 0.08                         | 0.511 ± 0.004          | 0.145 ± 0.029            | 67.10 ± 0.08 | 0.67                         |
| Flow 6                           | 75.25 ± 2.85   | -0.94 ± 0.06                         | 0.516 ± 0.002          | 0.172 ± 0.026            | 67.15 ± 0.10 | 0.67                         |
| Flow 5                           | 76.28 ± 5.18   | -0.95 ± 0.11                         | 0.517 ± 0.004          | 0.175 ± 0.039            | 67.13 ± 0.15 | 0.67                         |
| Flow 4                           | 85.82 ± 4.80   | -1.13 ± 0.10                         | 0.525 ± 0.004          | 0.244 ± 0.046            | 67.28 ± 0.12 | 0.67                         |
| Flow 3                           | 84.63 ± 2.39   | -1.10 ± 0.03                         | 0.523 ± 0.003          | 0.271 ± 0.060            | 67.31 ± 0.15 | 0.56                         |
| Flow 2                           | 85.69 ± 4.61   | -1.12 ± 0.08                         | 0.523 ± 0.003          | 0.350 ± 0.053            | 67.49 ± 0.10 | 0.17                         |
| Flow 1                           | 95.24 ± 4.71   | -1.30 ± 0.10                         | 0.529 ± 0.002          | 0.472 ± 0.061            | 67.75 ± 0.20 | 0.09                         |
| <b>FlexiMag</b>                  |                |                                      |                        |                          |              |                              |
| -1 cmH <sub>2</sub> O            | 61.46 ± 10.24  | -1.03 ± 0.47                         | 0.550 ± 0.020          | 0.103 ± 0.045            | 67.71 ± 3.93 | 0.23                         |
| 1 L/min                          | 60.54 ± 7.85   | -0.44 ± 0.31                         | 0.554 ± 0.006          | 0.039 ± 0.062            | 67.66 ± 0.49 | 0.65                         |
| 2 L/min                          | 83.18 ± 4.93   | -1.20 ± 0.10                         | 0.575 ± 0.003          | 0.247 ± 0.057            | 66.80 ± 0.22 | 0.50                         |
| 3 L/min                          | 85.47 ± 7.02   | -1.18 ± 0.13                         | 0.580 ± 0.003          | 0.334 ± 0.104            | 67.15 ± 0.35 | 0                            |
| 4 L/min                          | 114.65 ± 10.09 | -1.30 ± 0.09                         | 0.596 ± 0.002          | 0.884 ± 0.235            | 67.32 ± 0.23 | 0                            |
| <b>iX5</b>                       |                |                                      |                        |                          |              |                              |
| -1 cmH <sub>2</sub> O            | 154.54 ± 2.82  | -2.40 ± 0.01                         | 0.617 ± 0.009          | 1.294 ± 0.040            | 69.87 ± 1.78 | 0                            |
| 2 L/min                          | 159.81 ± 1.42  | -2.42 ± 0.01                         | 0.678 ± 0.005          | 1.301 ± 0.023            | 68.82 ± 1.80 | 0                            |
| 3 L/min                          | 161.53 ± 4.82  | -2.41 ± 0.07                         | 0.691 ± 0.010          | 1.373 ± 0.244            | 68.36 ± 2.16 | 0                            |

*Definition of abbreviations:* TD = time delay to trigger;  $\Delta P_{aw}$  = variation from PEEP to lowest inspiratory airway pressure; WOB<sub>i</sub> = patient inspiratory work of breathing; WOB<sub>trig</sub> = work of breathing while triggering; PIF = peak inspiratory flow.



**Table S6** – Trigger performance during a standard inspiratory effort during 1 cmH<sub>2</sub>O of cardiogenic oscillation.

| <b>Lung Compliance<br/>(mL/cmH<sub>2</sub>O)</b> | <b>TD<br/>(ms)</b> | <b>ΔPaw<br/>(cmH<sub>2</sub>O)</b> | <b>WOBtrig<br/>(mJ)</b> |
|--------------------------------------------------|--------------------|------------------------------------|-------------------------|
| 20                                               | 100.6 ± 2.5        | -1.87 ± 0.06                       | 0.705 ± 0.04            |
| 40                                               | 103.0 ± 5.6        | -1.92 ± 0.20                       | 0.701 ± 0.08            |
| 60                                               | 103.9 ± 2.8        | -1.94 ± 0.05                       | 0.690 ± 0.06            |
| 80                                               | 106.3 ± 1.9        | -1.99 ± 0.04                       | 0.715 ± 0.05            |

Definition of abbreviations: TD = time delay to trigger; ΔPaw = variation from PEEP to lowest inspiratory airway pressure; WOBtrig = work of breathing while triggering.

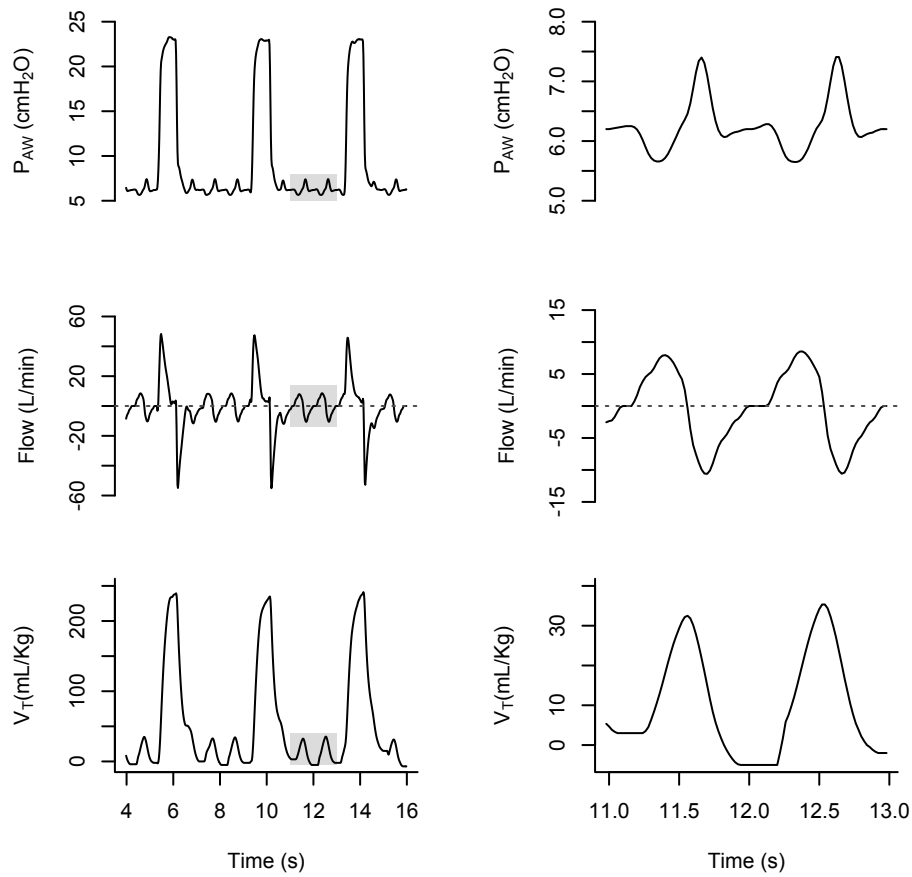

**Figure S1** – Effect of cardiogenic oscillation on airway pressure ( $P_{aw}$ ), flow and tidal volume ( $V_T$ ) of a subject with acute respiratory distress syndrome under mechanical ventilation. This subject, with a compliance of 19  $\text{mL/cmH}_2\text{O}$ , was enrolled in a clinical trial designed to assess the effect on survival of lung recruitment maneuvers and high PEEP (ClinicalTrials.gov: NCT01374022). The magnitude of cardiogenic oscillations was of approximately 5  $\text{L/min}$  in airway flow.

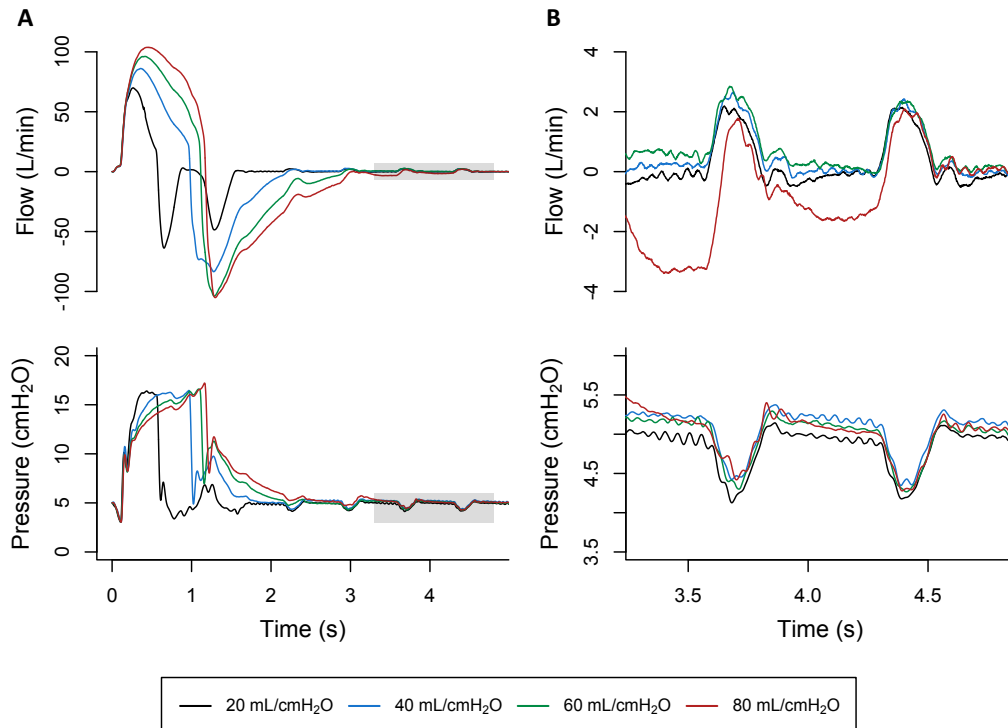

**Figure S2** – Effect of different simulated compliance settings [20 (black), 40 (blue), 60 (green), and 80 (red) mL/cmH<sub>2</sub>O] on changes in airway pressure and flow (A) caused by simulated cardiogenic oscillations of 1 cmH<sub>2</sub>O in the Servo-I ventilator (Maquet). A zoom into the shaded area (B) shows no significant change on airway pressure and flow at the end-expiration.
